# Supplementary material
Source: Springer Nature journal article supplement (https://www.springermedizin.de/resource/supplementary/13075_2012_4111_MOESM4_ESM.pdf/9696096)

**A**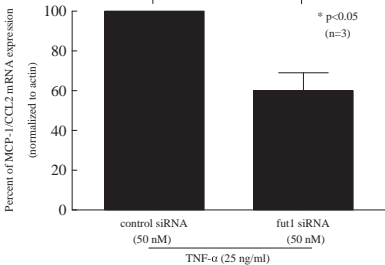**B**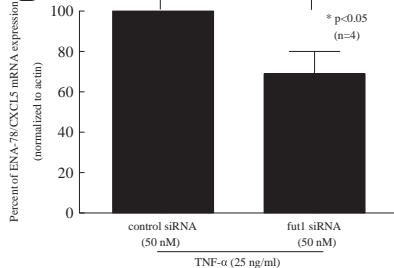**C**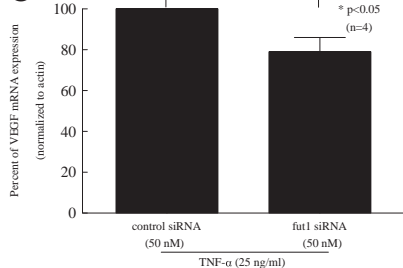**D**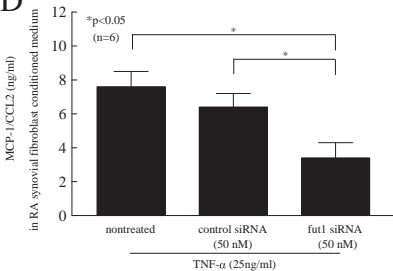**E**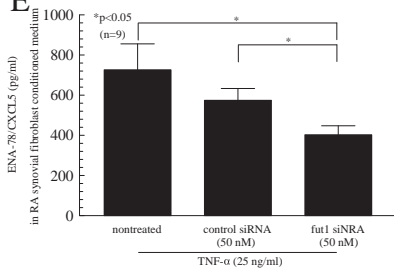**F**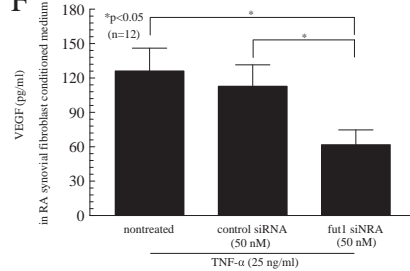

Supplement: MOESM4 [file 9696096]
